# Supplementary material for: Methylation of leukocyte DNA and ovarian cancer: relationships with disease status and outcome
Source: PubMed Central journal article supplement (PMC4102255; doi:10.1186/1755-8794-7-21), 2014-04-28

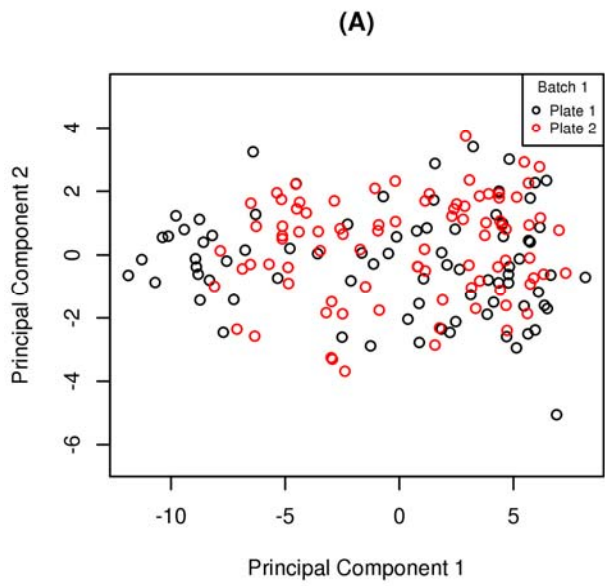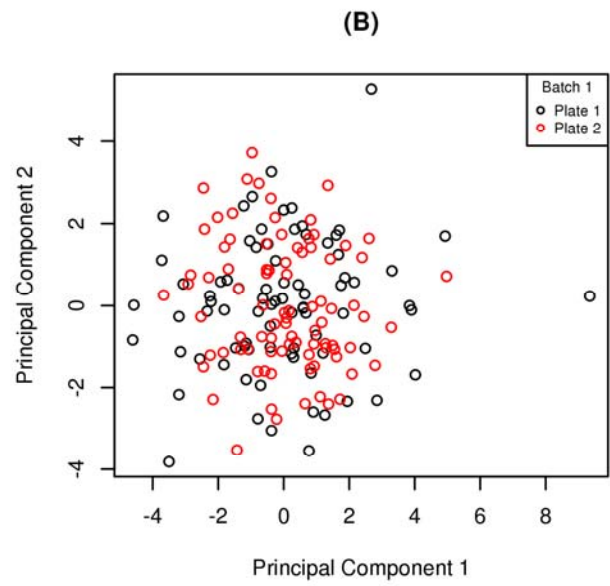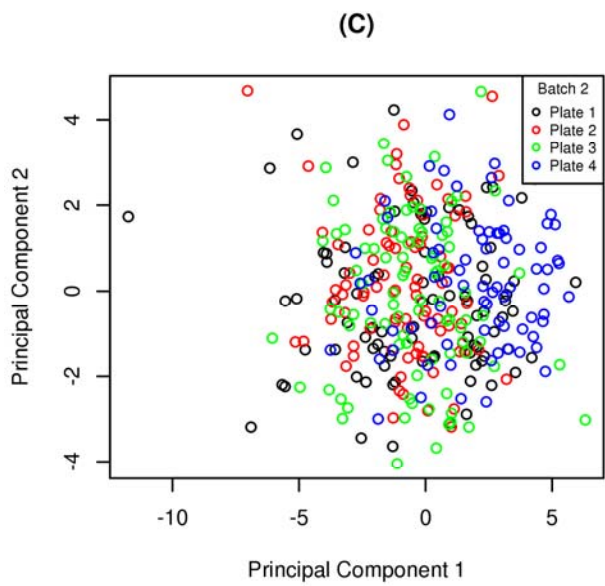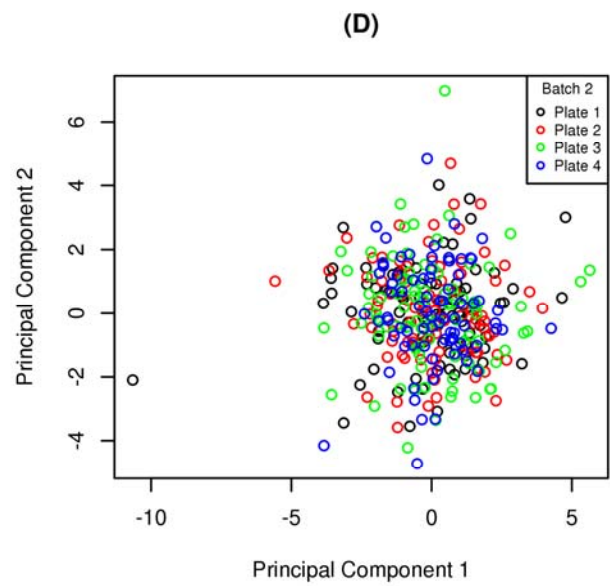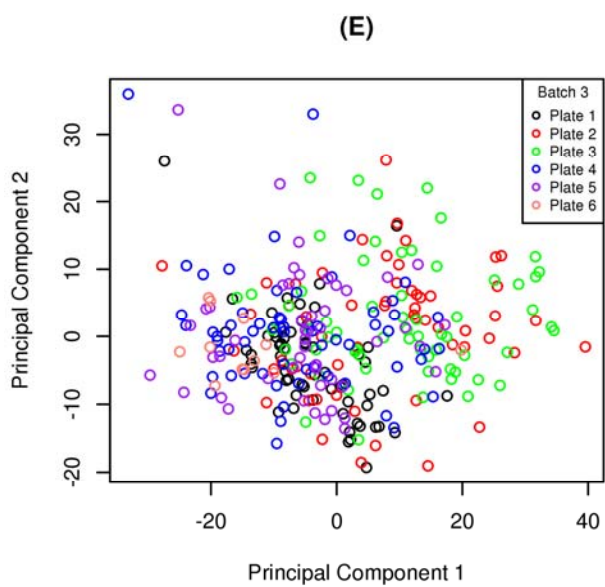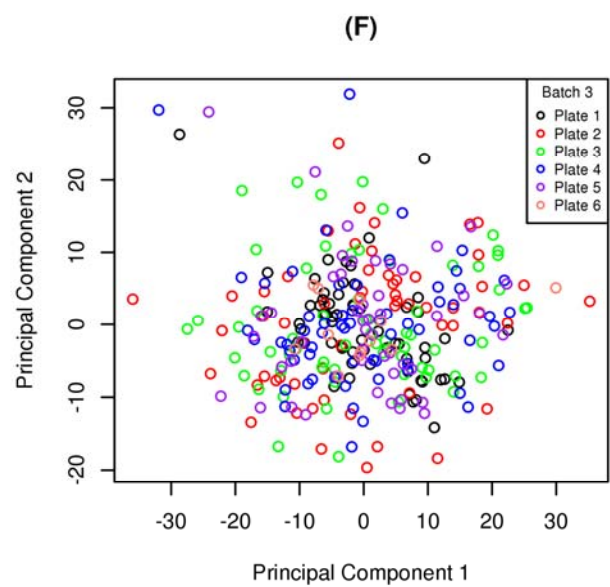

Supplement: 1755-8794-7-21-S1.pdf [file 1755-8794-7-21-S1.pdf]
